# Supplementary material for: Interaction of TiO2 nanoparticles with lung fluid proteins and the resulting macrophage inflammatory response
Source: Royal Society of Chemistry journal article supplement (doi:10.1039/d3en00179b), 2023-01-01
Supplement: d3en00179b2.xlsx [file d3en00179b2.xlsx]

## Sheet: Sheet_1
UniProt Accession Number	Protein Name	BALF-TiO2_1	BALF-TiO2_2	BALF-TiO2_3	BALF_1	BALF_2	BALF_3
P07724	Albumin	77.5478	75.944	81.0834	93.9041	85.4609	85.6906
Q921I1	Serotransferrin	9.29484	4.6863	3.11343	1.50879	5.08974	3.58649
P02088	Hemoglobin subunit beta-1	4.78525	3.42423	4.28042	0.190255	3.07694	3.24363
P07758	Alpha-1-antitrypsin 1-1	1.61786	3.46151	1.22231	0.440662	0.831014	1.4834
P01942	Hemoglobin subunit alpha	0.785071	3.12375	2.04591	0.0103433	1.10361	0.213278
P07759	Serine protease inhibitor A3K	0.864763	1.64616	0.561805	0.405407	1.12658	1.60759
P08905	Lysozyme C-2	0.00685028	0.966097	1.10143	1.09337	0.323274	0.775444
Q06318	Uteroglobin	0.744624	0.844964	0.315218	0	0.123472	0
Q61646	Haptoglobin	0.781665	0.230922	0.863306	0	0.191379	0.228484
P07309	Transthyretin	0.429409	0.566976	0.777294	0	0.0705355	0.177637
Q00898	Alpha-1-antitrypsin 1-5	0.125126	0.0901722	1.41103	0.442326	0.092972	0.516186
Q91X72	Hemopexin	0.42216	0.588333	0.416826	0.0797989	0.263154	0.235856
O35744	Chitinase-like protein 3	0.510256	0.495536	0.415124	1.43797	0.450082	0.337064
Q00897	Alpha-1-antitrypsin 1-4	0.512934	0.485365	0.293468	0.182868	0.470979	0.457142
O08709	Peroxiredoxin-6	0.311937	0	0.365001	0	0	0.242394
P10649	Glutathione S-transferase Mu 1	0.183798	0.208588	0.228936	0	0.222013	0.0589038
P24549	Aldehyde dehydrogenase 1A1	0.0180566	0.335149	0.233023	0.0237771	0.0937427	0.0420075
P50446	Keratin, type II cytoskeletal 6A	0	0.389585	0	0	0.000799947	0
P06684	Complement C5	0.0943844	0.149189	0.0562686	0.00402808	0.0442932	0.122338
O08677	Kininogen-1	0.129281	0.124263	0.0390673	0.00199657	0.0129591	0.009144
Q00623	Apolipoprotein A-I	0	0.227781	0.029961	0	0	0
P50405	Pulmonary surfactant-associated protein B	0.0336639	0	0.219376	0	0.00137936	0
Q00896	Alpha-1-antitrypsin 1-3	0	0.214211	0	0.177464	0	0.00849375
P97361	BPI fold-containing family A member 1	0.0821419	0.0898348	0.0340503	0	0.0290965	0.0295073
Q9DBD0	Inhibitor of carbonic anhydrase	0.0101398	0.103817	0.0828955	0	0.0182554	0
Q61362	Chitinase-3-like protein 1	0	0	0.192107	0.00518415	0.0839902	0.0116523
P08074	Carbonyl reductase	0.00382487	0.0371725	0.10127	0	0.00574529	0.00291937
Q922U2	Keratin, type II cytoskeletal 5	0	0.128688	0	0	0	0.000224328
P28665	Murinoglobulin-1	0.027179	0.0322717	0.0524201	0.00345437	0.0465953	0.0241243
P29391	Ferritin light chain 1	0	0.10719	0	0	0	0.0035177
P63260	Actin, cytoplasmic 2	0.00270682	0	0.100866	0.0044444	0.0111431	0.00334515
P06728	Apolipoprotein A-IV	0.0879238	0	0.0113945	0	0	0
Q61838	Pregnancy zone protein	0.0734559	0.0026377	0.0064413	0.00177163	0.0711293	0.077081
P21614	Vitamin D-binding protein	0.055547	0	0.0268325	0	0.0305248	0.00203915
Q9JJH1	Ribonuclease 4	0.0398717	0.0310847	0.0110011	0	0	0.0180874
P62259	14-3-3 protein epsilon	0.00775271	0.050424	0.0190862	0	0.00749328	0.00486273
P32261	Antithrombin-III	0.0477359	0.00666643	0	0	0.00809621	0
O09131	Glutathione S-transferase omega-1	0.0333257	0.0126378	0.00656931	0	0.0583432	0.0364
P34928	Apolipoprotein C-I	0	0.0500572	0	0	0.00595631	0
P22599	Alpha-1-antitrypsin 1-2	0	0.0483177	0	0	0.000562095	0.0188485
P19221	Prothrombin	0.0142532	0	0.027779	0	0.00424001	0.00284631
Q9WVL7	C-X-C motif chemokine 15	0	0.0238661	0.0129817	0	0	0
P97298	Pigment epithelium-derived factor	0.0147842	0.00981965	0.00657706	0	0	0
Q61147	Ceruloplasmin	0.00600245	0	0.024533	0	0	0.00283777
Q61247	Alpha-2-antiplasmin	0.0203237	0	0.00908602	0	0.0115843	0
P52480	Pyruvate kinase PKM	0.0236896	0.00431357	0.000999465	0	0.013074	0.00488872
P01027	Complement C3	0.0106382	0.00275774	0.0122865	0	0.114129	0.113199
P17563	Methanethiol oxidase	0.00999296	0.00216986	0.0133411	0	0.137795	0.0762265
P06151	L-lactate dehydrogenase A chain	0.00638498	0.00778865	0.0105717	0	0.00726787	0.00642339
O08912	Polypeptide N-acetylgalactosaminyltransferase 1	0.0102212	0.0119363	0	0	0	0
P11588	Major urinary protein 1	0	0	0.0216734	0	0.00594671	0.223944
P02089	Hemoglobin subunit beta-2	0.000355892	0	0.0190193	0	0	0
P42703	Leukemia inhibitory factor receptor	0.00886268	0.00667731	0	0	0	0.00991807
P01872	Immunoglobulin heavy constant mu	0	0.00708708	0.00721522	0	0.0109842	0.00188695
P48036	Annexin A5	0.00564381	0.00609286	0.00214174	0	0	0.00526316
Q00724	Retinol-binding protein 4	0	0.0137319	0	0.00343974	0	0
P01029	Complement C4-B	0.00385581	0	0.00955672	0	0.00533686	0.00304269
P05213	Tubulin alpha-1B chain	0.00457401	0.00860379	0	0	0.0117786	0.0105719
P11276	Fibronectin	0.00290247	0.00733096	0.00274314	0	0	0.000624895
P23953	Carboxylesterase 1C	0	0	0.0121103	0	0.0577258	0.0943726
Q03734	Serine protease inhibitor A3M	0.00731615	0	0.00461946	0	7.20031e-05	0
P06683	Complement component C9	0.00515589	0.00584201	0	0	0	0.00165009
Q9R1P4	Proteasome subunit alpha type-1	0.00466878	0.00617916	0	0	0	0
Q06890	Clusterin	0.00425473	0	0.00643237	0	0	0
Q61598	Rab GDP dissociation inhibitor beta	0.00514135	0.00441222	0	0	0	0
P68134	Actin, alpha skeletal muscle	0.000426593	0	0.00847276	0	0.00747637	0
P03953	Complement factor D	0.00765378	0	0.000933523	0	0.00735132	0.00830331
P08071	Lactotransferrin	0	0	0.00840194	0	0.000954494	0
Q61114	BPI fold-containing family B member 1	0	0.00811676	0	0	0	0.0123684
P10126	Elongation factor 1-alpha 1	0.00540741	0	0.00263604	0	0	0
P35242	Pulmonary surfactant-associated protein A	0.00633916	0	0	0.00286603	0	0
P47791	Glutathione reductase, mitochondrial	0.000720719	0	0.00533584	0	0	0
P06745	Glucose-6-phosphate isomerase	0.00225642	0	0.00321489	0.00299232	0	0
Q6URW6	Myosin-14	0	0.00209737	0.00323615	0	0	0.000784423
O88844	Isocitrate dehydrogenase	0.00527986	0	0	0	0.0152699	0
Q9Z0J0	NPC intracellular cholesterol transporter 2	0	0	0.00491846	0	0	0.00133518
Q9DBJ1	Phosphoglycerate mutase 1	0	0.00183846	0.0030594	0	0	0
Q9DBP5	UMP-CMP kinase	0.0018553	0.00055139	0.00222876	0	0	0
E9PV24	Fibrinogen alpha chain	0	0.00107622	0.0028782	0	0.0255518	0.00574599
P29699	Alpha-2-HS-glycoprotein	0.00118281	0.00260103	0	0	0	0
P01843	Ig lambda-1 chain C region	0	0.00117541	0.00259024	0	0	0
P12787	Cytochrome c oxidase subunit 5A, mitochondrial	0.00128612	0.00133554	0.00104087	0	0	0
G3X982	Aldehyde oxidase 3	0.000455346	0	0.00317778	0	0	0
P17751	Triosephosphate isomerase	0	0	0.00333785	0	0.00988628	0.00713352
Q8K0E8	Fibrinogen beta chain	0.00325165	0	0	0	0	0.0135603
Q01853	Transitional endoplasmic reticulum ATPase	0.0030149	0	0	0	0	0.000686799
P24527	Leukotriene A-4 hydrolase	0.000704178	0.00139935	0.000739913	0	0	0
Q64726	Zinc-alpha-2-glycoprotein	0.00268408	0	0	0	0.00198174	0
P20918	Plasminogen	0	0	0.00244579	0	0.00867272	0
P51174	Long-chain specific acyl-CoA dehydrogenase, mitochondrial	0.00134302	0	0.00088239	0	0	0
P40124	Adenylyl cyclase-associated protein 1	0	0	0.00205671	0	0	0.00112758
Q9QUR6	Prolyl endopeptidase	0.00190701	0	0	0	0	0.000739673
P26262	Plasma kallikrein	0	0	0.00185659	0	0	0.00051439
Q9R098	Hepatocyte growth factor activator	0	0	0.00161432	0	0.000787678	0
O88947	Coagulation factor X	0.00138238	0	0	0	0.000853901	0
P01837	Immunoglobulin kappa constant	0	0.0013436	0	0.0411716	0	0
P01868	Ig gamma-1 chain C region secreted form	0	0	0.00111357	0	0.00239033	0.00201004
Q99MN9	Propionyl-CoA carboxylase beta chain, mitochondrial	0.000671326	0	0	0	0	0.000489198
P26040	Ezrin	0.000654127	0	0	0.00171533	0	0
P10852	4F2 cell-surface antigen heavy chain	0.000560837	0	0	0	0.00136662	0
Q61702	Inter-alpha-trypsin inhibitor heavy chain H1	0.000301479	0	0	0	0.000106405	0.00282553
P49182	Heparin cofactor 2	0	0	0.000217309	0	0	0.000160549
Q9JKF1	Ras GTPase-activating-like protein IQGAP1	9.30316e-05	0	5.34923e-05	0	0	0
P13020	Gelsolin	0	0	0	0.00497339	0.0233582	0.0071664
Q80YC5	Coagulation factor XII	0	0	0	0.00504376	0.00447997	0.00471153
P06909	Complement factor H	0	0	0	0	0.00835418	0.00429756
P05064	Fructose-bisphosphate aldolase A	0	0	0	0	0.00617126	0.000178463
Q62151	Advanced glycosylation end product-specific receptor	0	0	0	0	0.00779522	0.00276166
Q9D3H2	Odorant-binding protein 1a	0	0	0	0	0.00487102	0.00436121
O70325	Phospholipid hydroperoxide glutathione peroxidase	0	0	0	0	0.00106492	0.00072181
P07901	Heat shock protein HSP 90-alpha	0	0	0	0	0.000727826	0.00857196
P26041	Moesin	0	0	0	0	0.00462972	0.00445136
